# Supplementary material for: Validating and enabling phosphoglycerate dehydrogenase (PHGDH) as a target for fragment-based drug discovery in PHGDH-amplified breast cancer
Source: Oncotarget. 2016 Aug 22;9(17):13139–53. doi: 10.18632/oncotarget.11487 (PMC5862567; doi:10.18632/oncotarget.11487)
Supplement: Supplementary file 1 [file oncotarget-09-13139-s001.pdf]

## Validating and enabling phosphoglycerate dehydrogenase (PHGDH) as a target for fragment-based drug discovery in PHGDH-amplified breast cancer

### SUPPLEMENTARY FIGURES AND TABLES

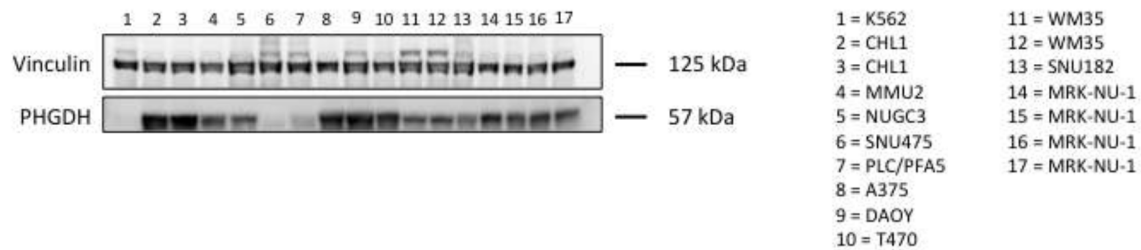

**Supplementary Figure S1: Representative Western blot showing PHGDH expression in a panel of cancer cell lines.** Cells were harvested, lysed and the proteins separated by gel electrophoresis. Proteins were detected by Western blotting.

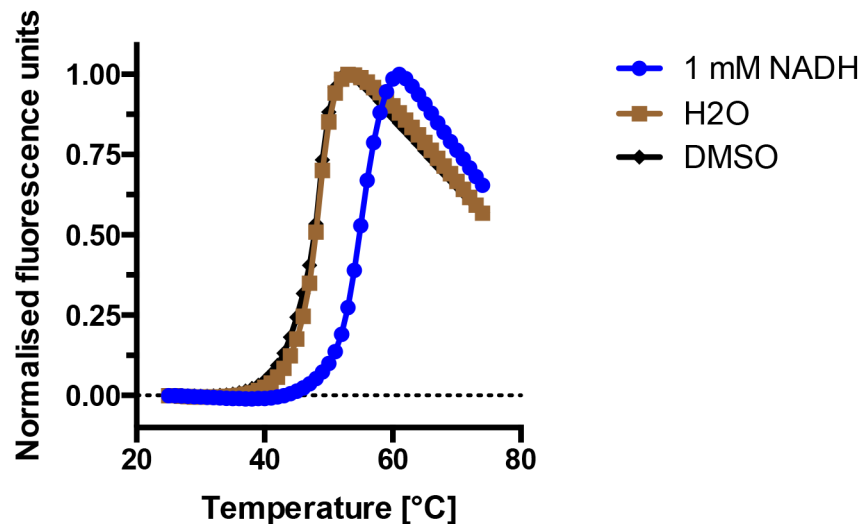

**Supplementary Figure S2: Thermal profile of NADH and DMSO.** Thermal denaturation profile of 15  $\mu$ M PHGDH was recorded in the presence (NADH) or absence (H<sub>2</sub>O / DMSO) of 1 mM NADH. The DMSO sample contained 2 % (vol/vol) DMSO. The heat denaturation of PHGDH over 25-80 °C was followed using the fluorescence of Sypro Orange.

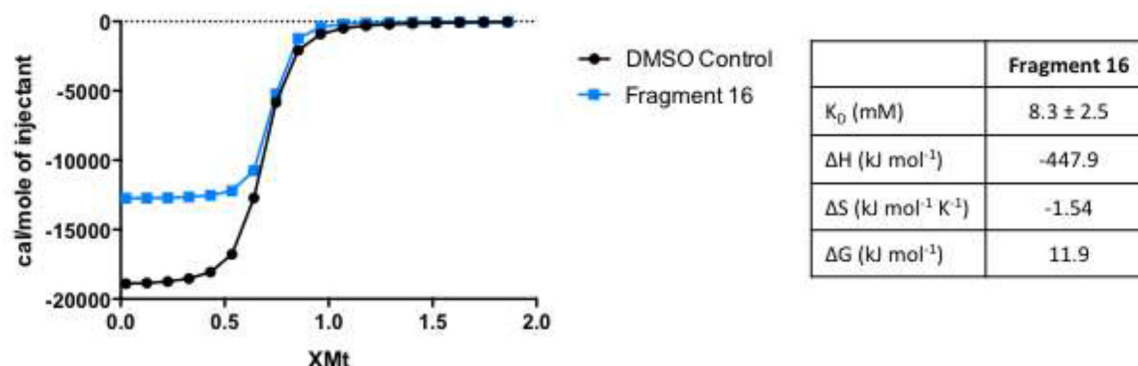

**Supplementary Figure S3: ITC competition experiment with fragment 16.** 0.5 mM NAD<sup>+</sup> mixed with 5 mM fragment 16 was titrated into 0.05 mM PHGDH mixed with 5 mM fragment 16 in 25 mM HEPES, pH 7.5, 100 mM NaCl, 0.5 mM TCEP and 5 % (v/v) DMSO. Data were analysed by non-linear regression using the built-in one-site fit model of the ORIGIN software. Data showing the heat generated per mole of injected ligand against the molar ratio of receptor to ligand was plotted in GraphPad prism.

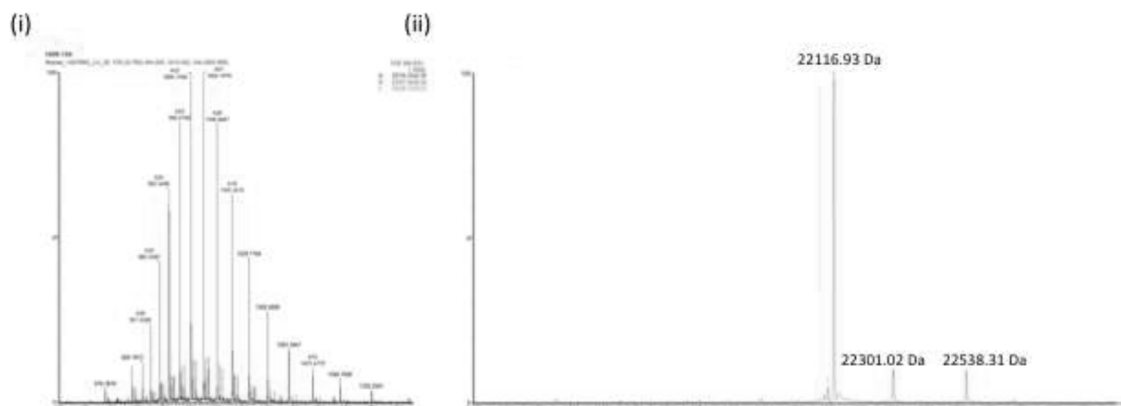

**Supplementary Figure S4: Mass Spectrum analysis of fragment 93.** (i) Positive ESI-MS m/z spectrum of new fragment 93, (ii) Molecular mass profile of m/z spectrum shown in (i).

**Supplementary Table S1: Repurchased fragment hits from DSF screening.**

See Supplementary File 1

**Supplementary Table S2: Crystallographic data collection (A) and refinement statistics (B) for all new fragment-bound crystal structures from this study.**

See Supplementary File 2
